# Supplementary material for: The genetic origin and architecture of sex determination
Source: Research Square preprint supplement (doi:10.21203/rs.3.rs-1147192/v1), 2021-12-09

# ADRENAL CANCER

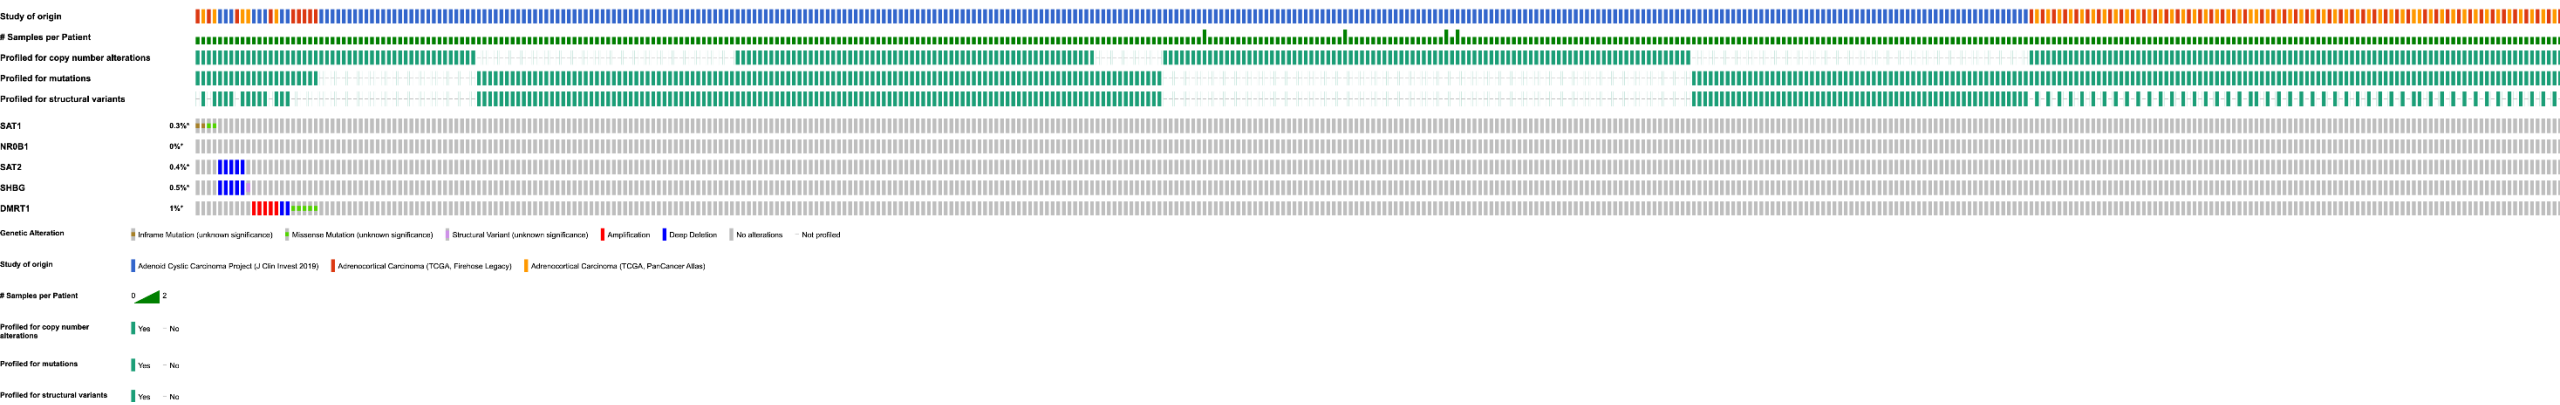

# BLADDER CANCER

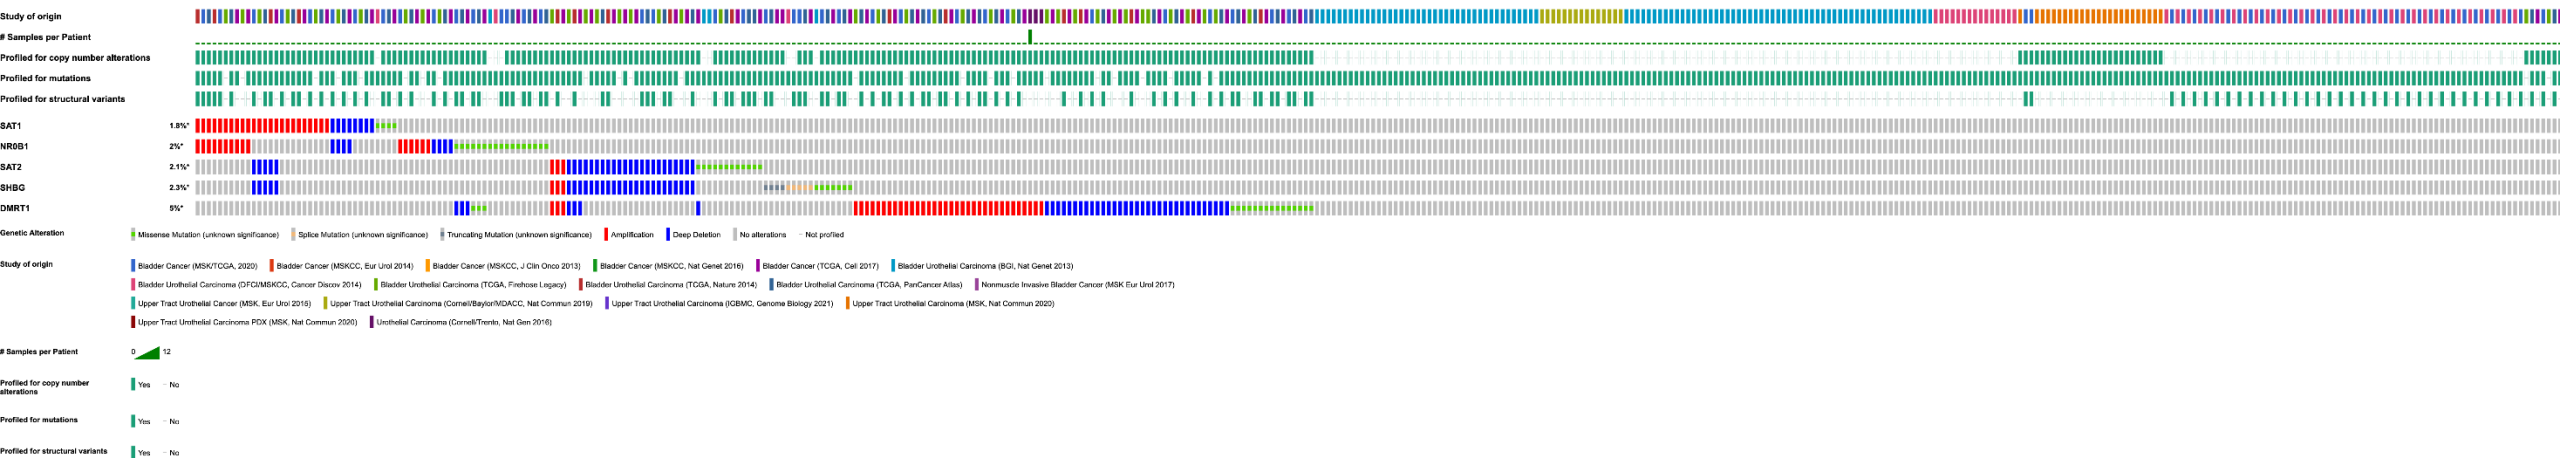

# BOWEL CANCER

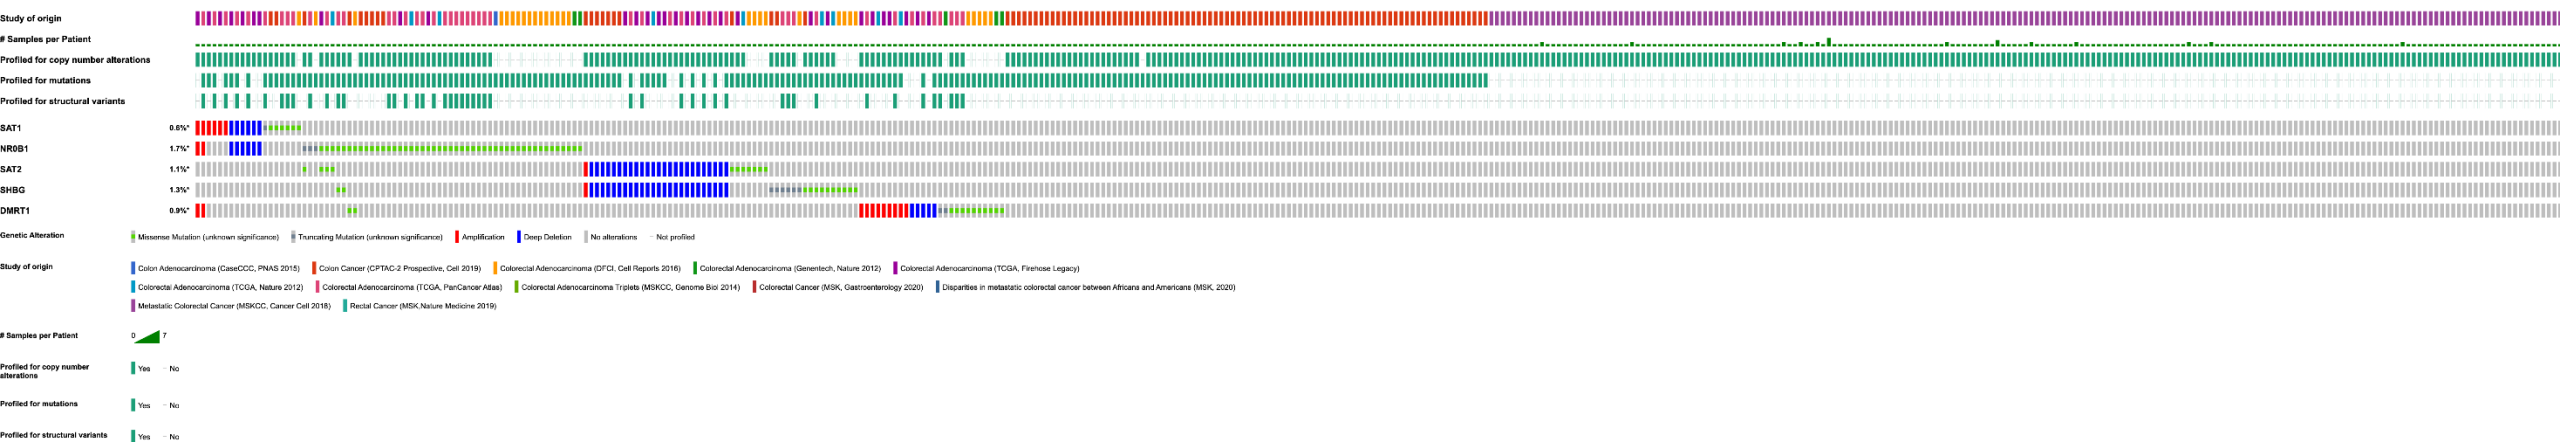

# BREAST CANCER

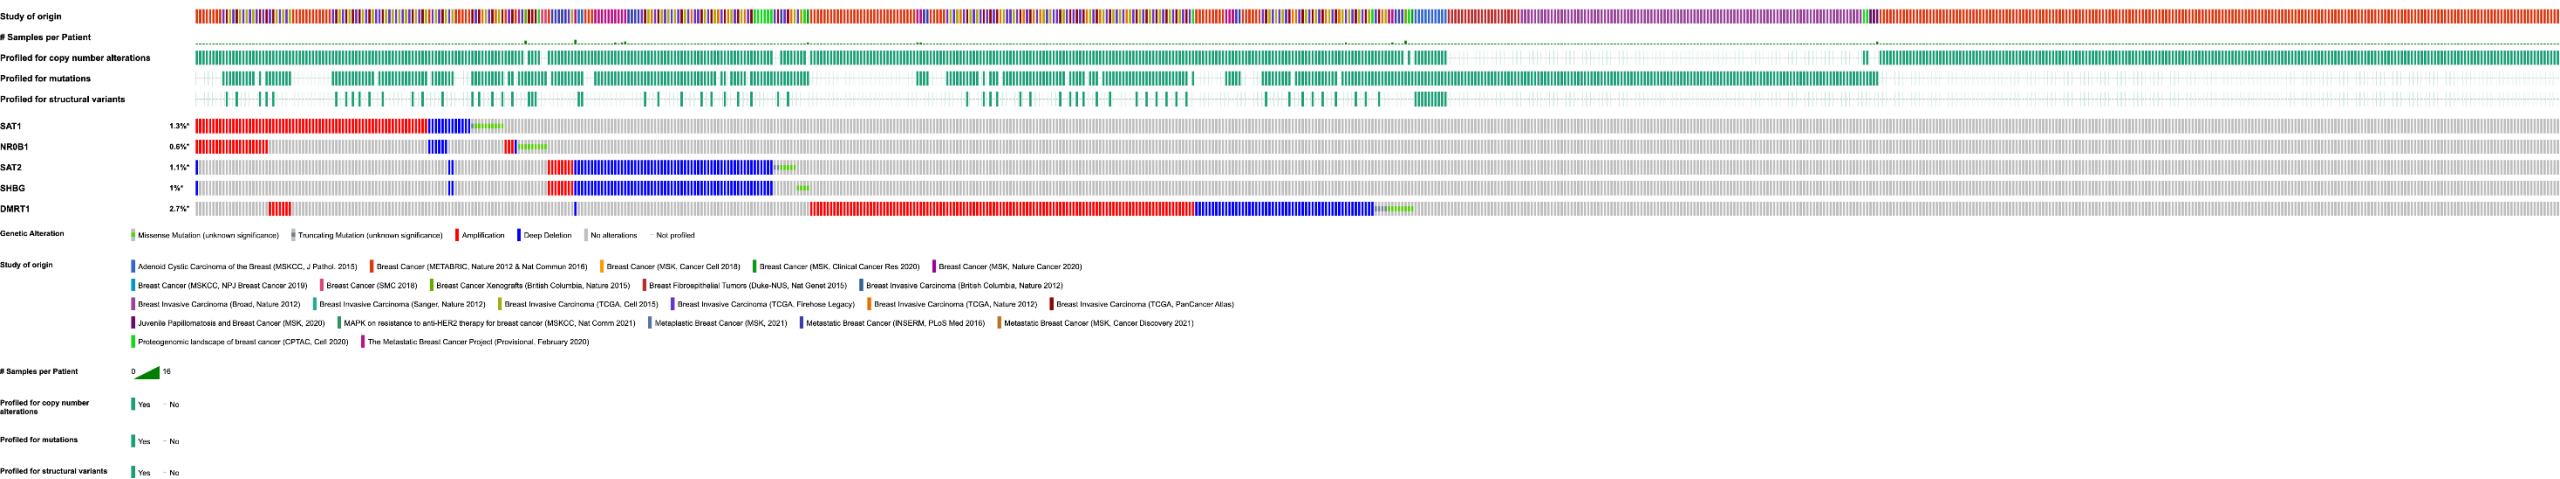

# CELL LINES

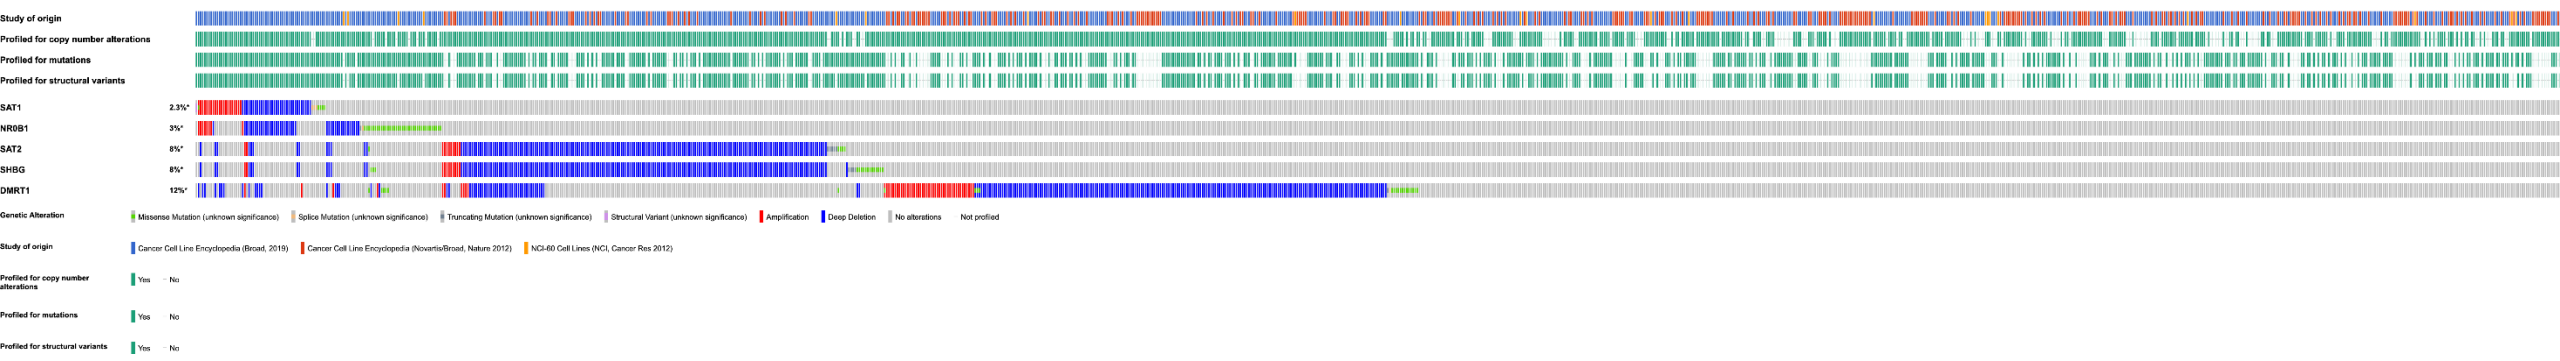

# CERVIX CANCER

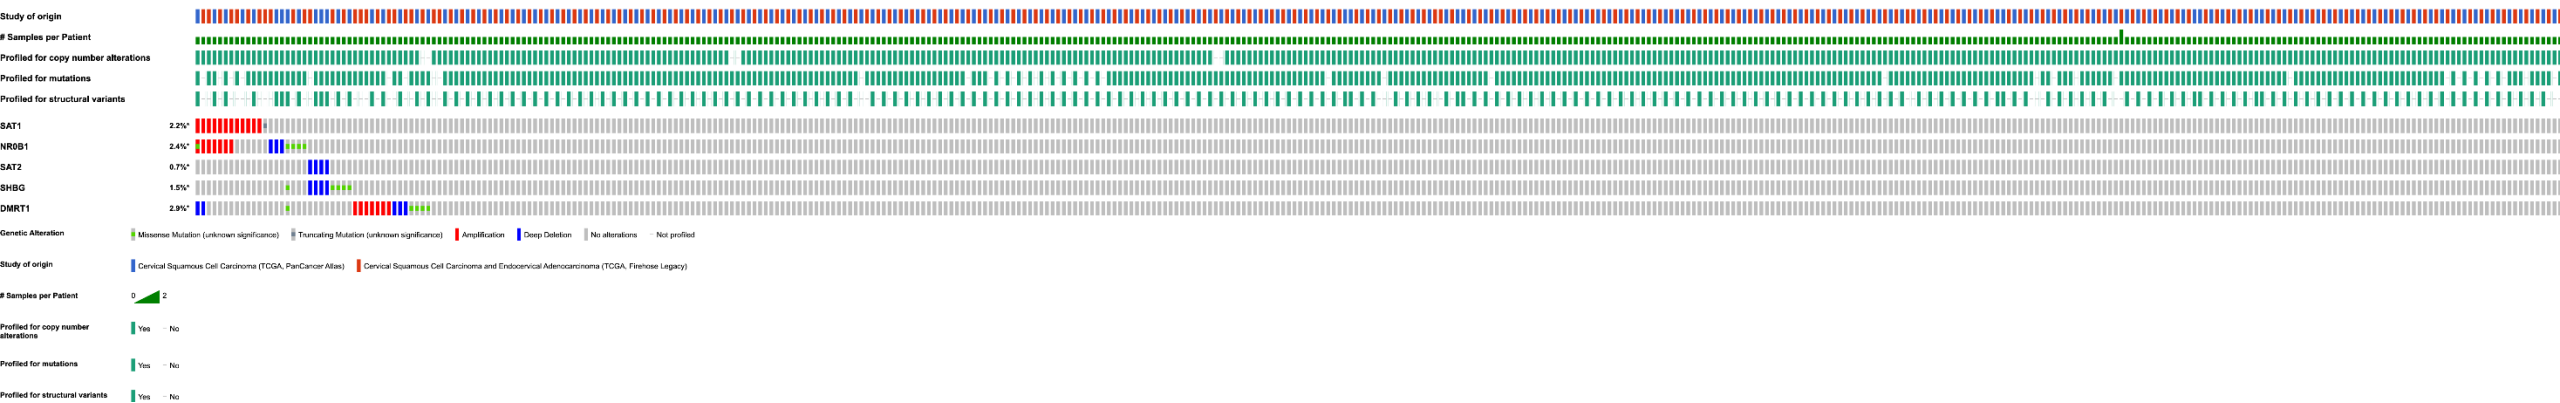

# CNS BRAIN CANCER

# HEAD AND NECK CANCER

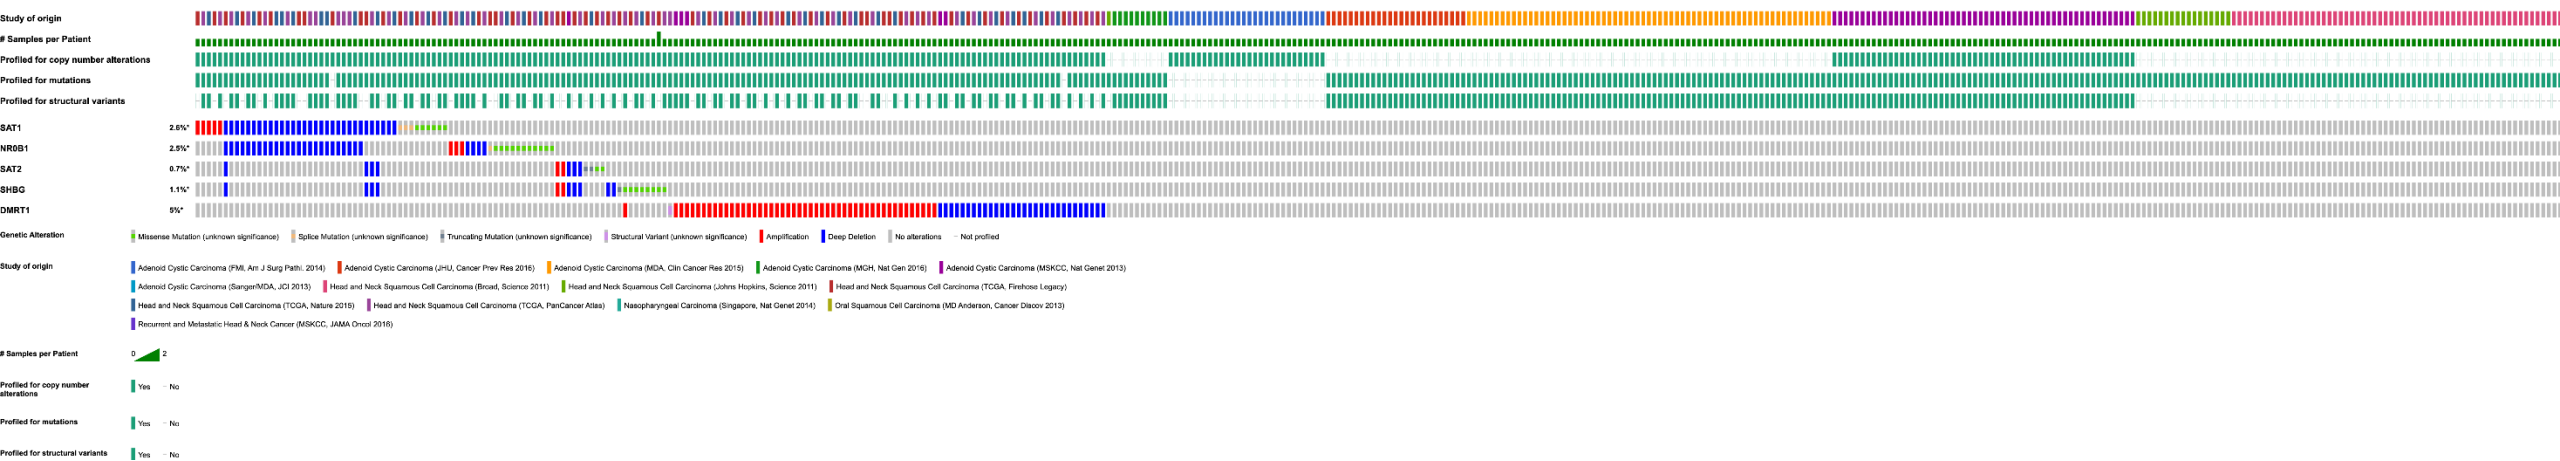



# IMMUNO GENIC CANCER

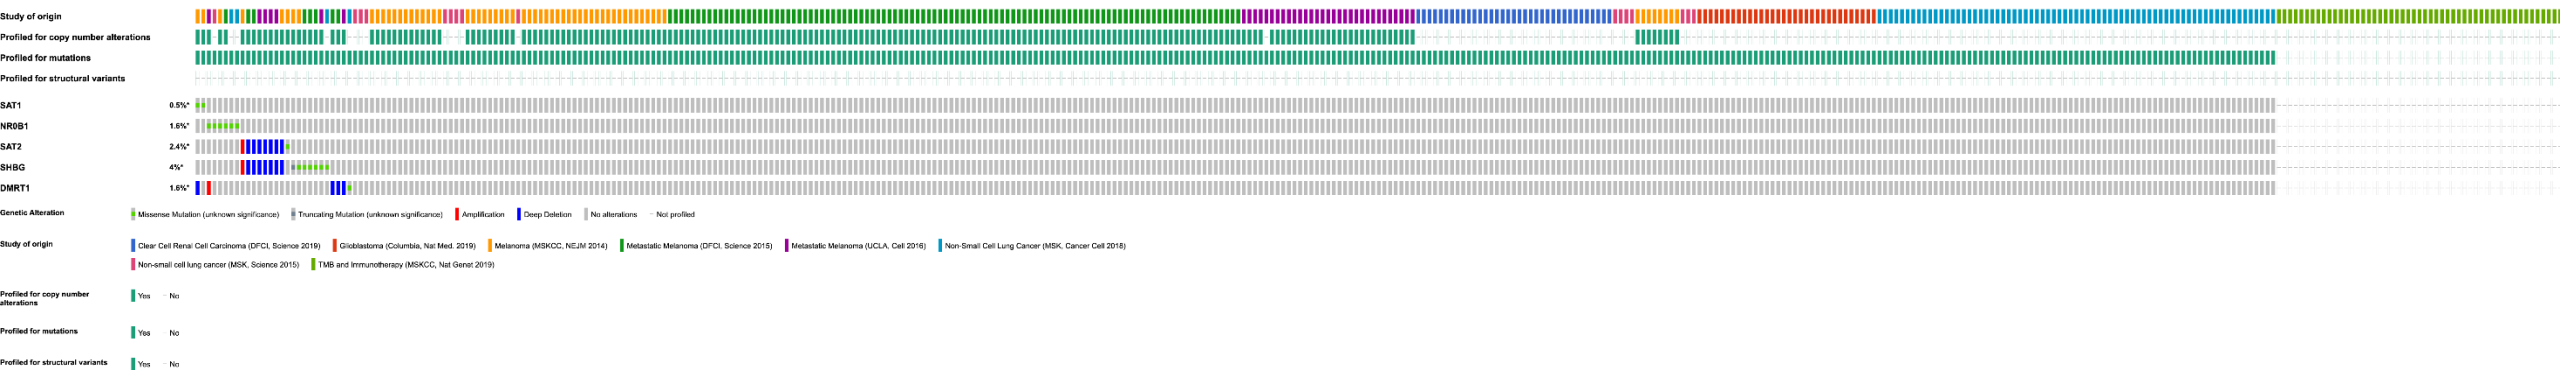

# KIDNEY CANCER

# LIVER CANCER

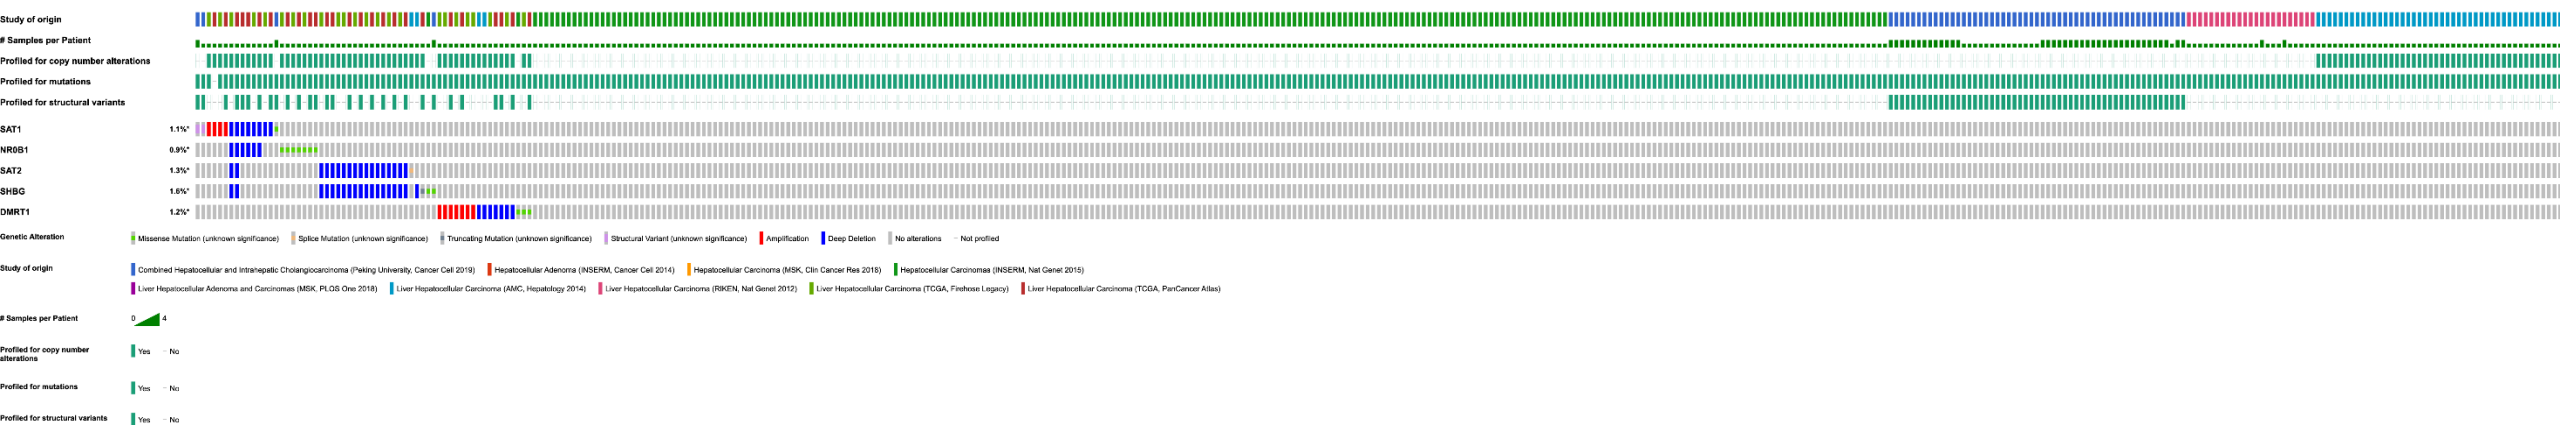

# LUNG CANCER

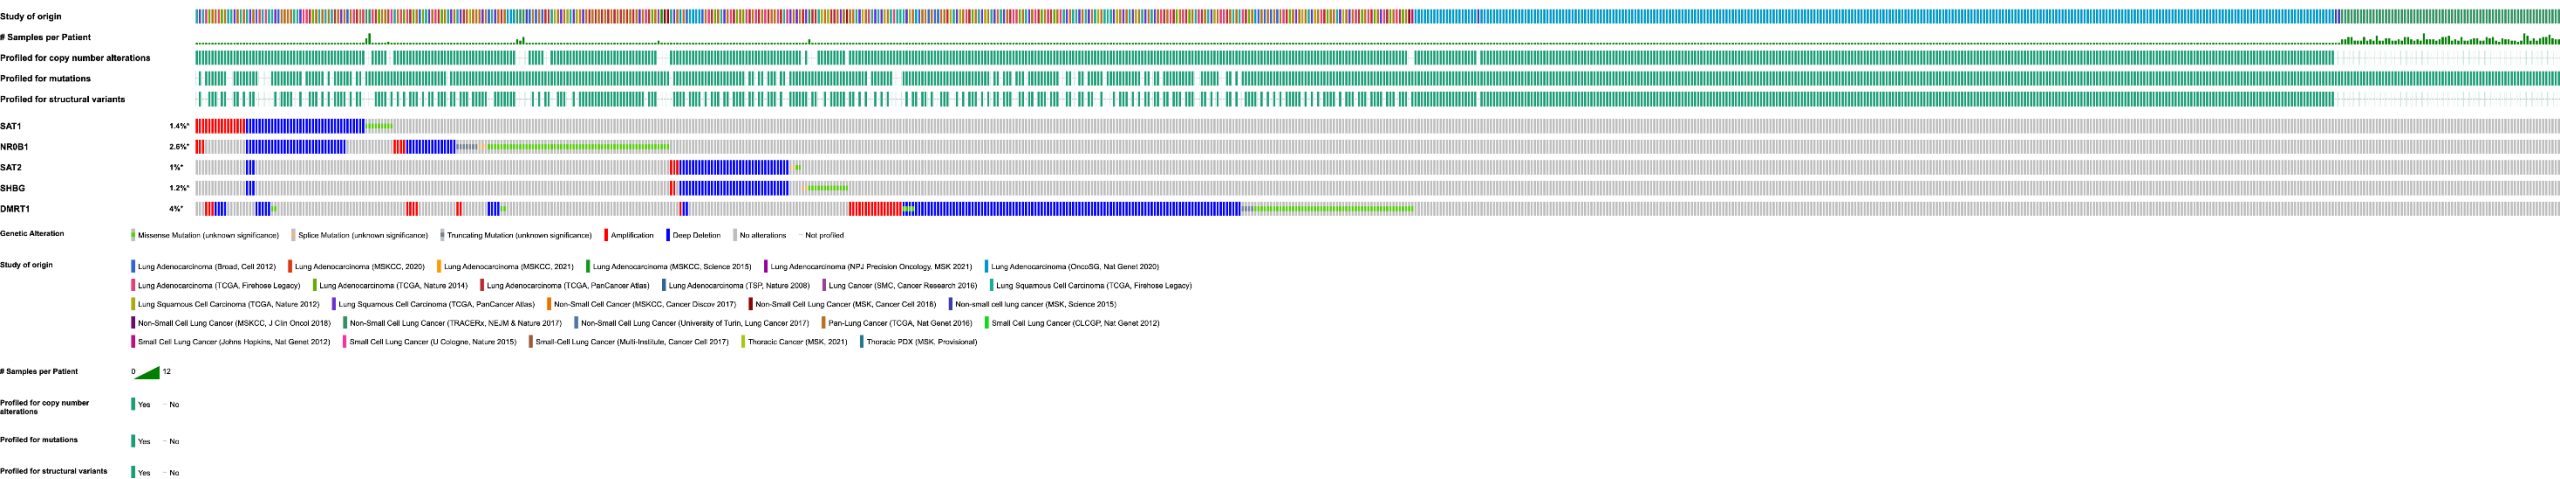

# LYMPHOID CANCER

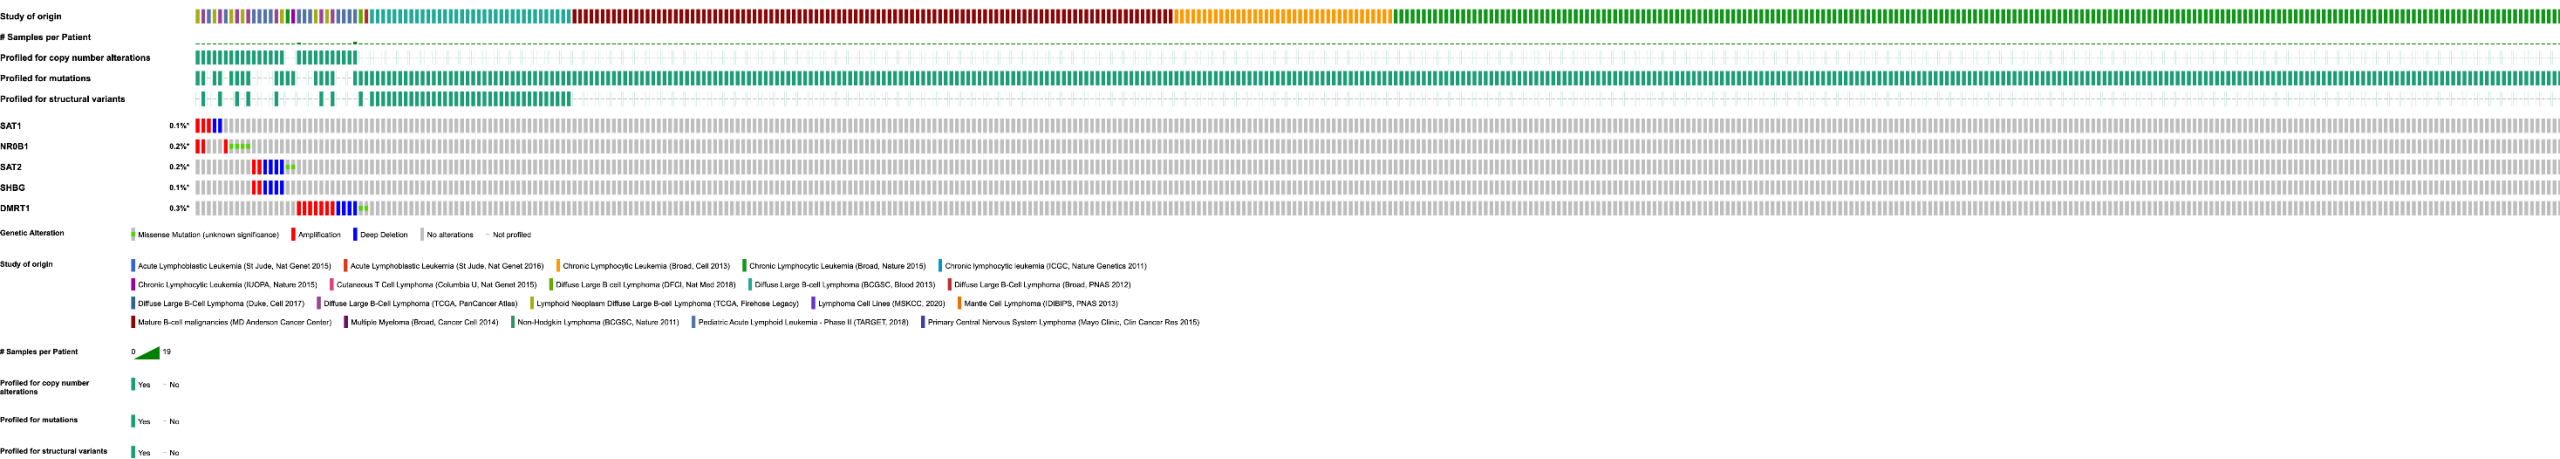

# MYELOID CANCER

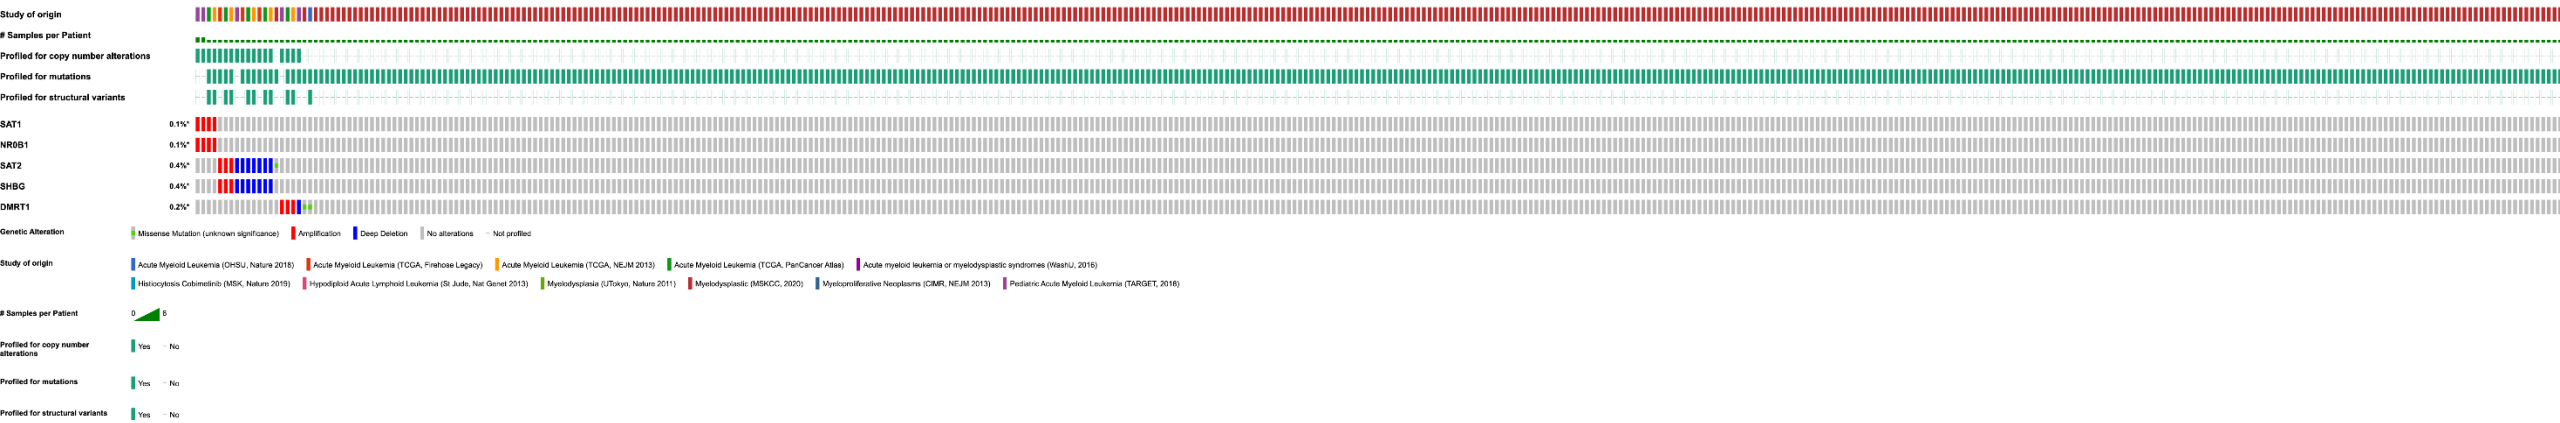

# OESOPHAGAL CANCER

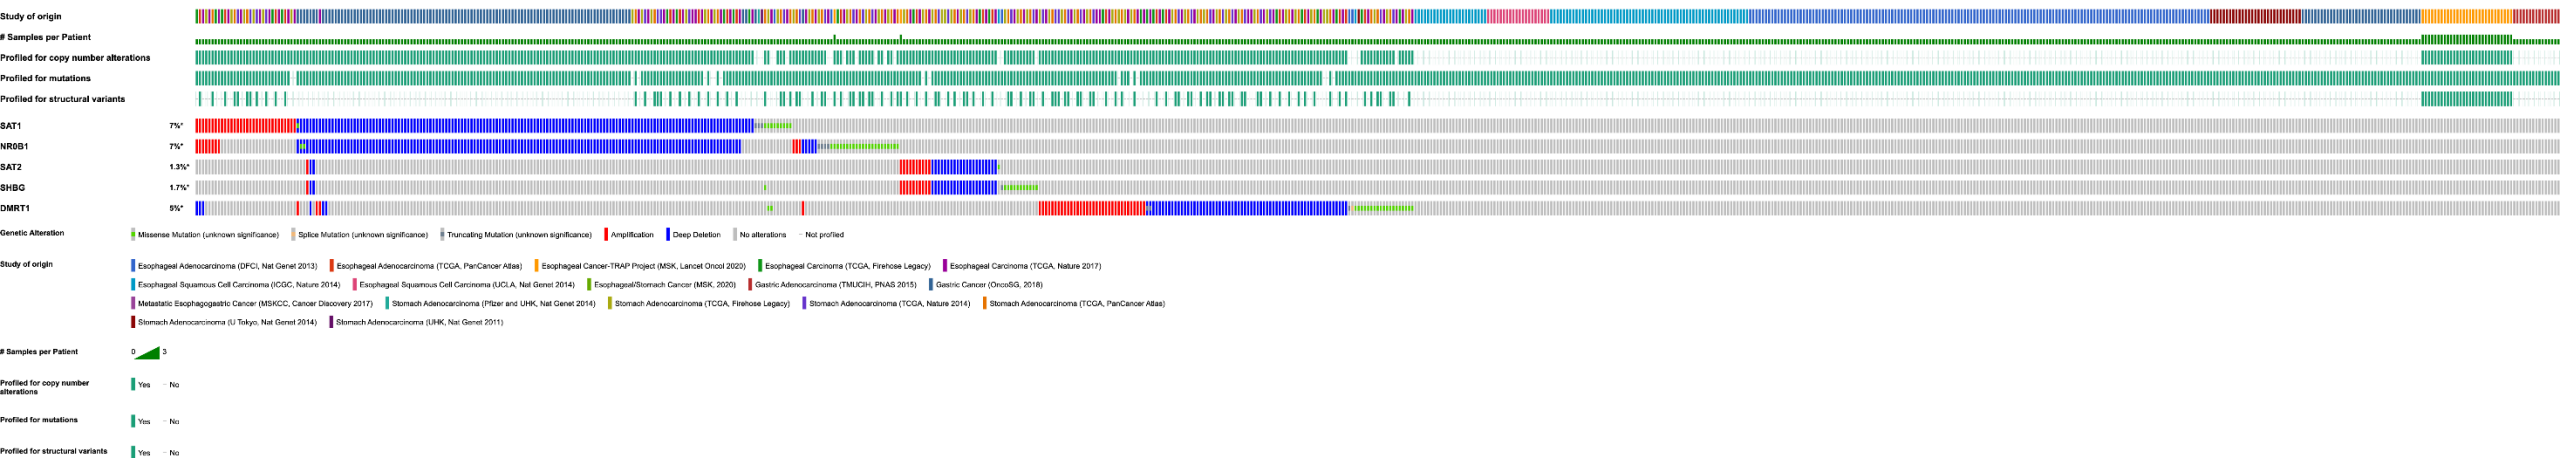

# OTHER CANCER TYPES

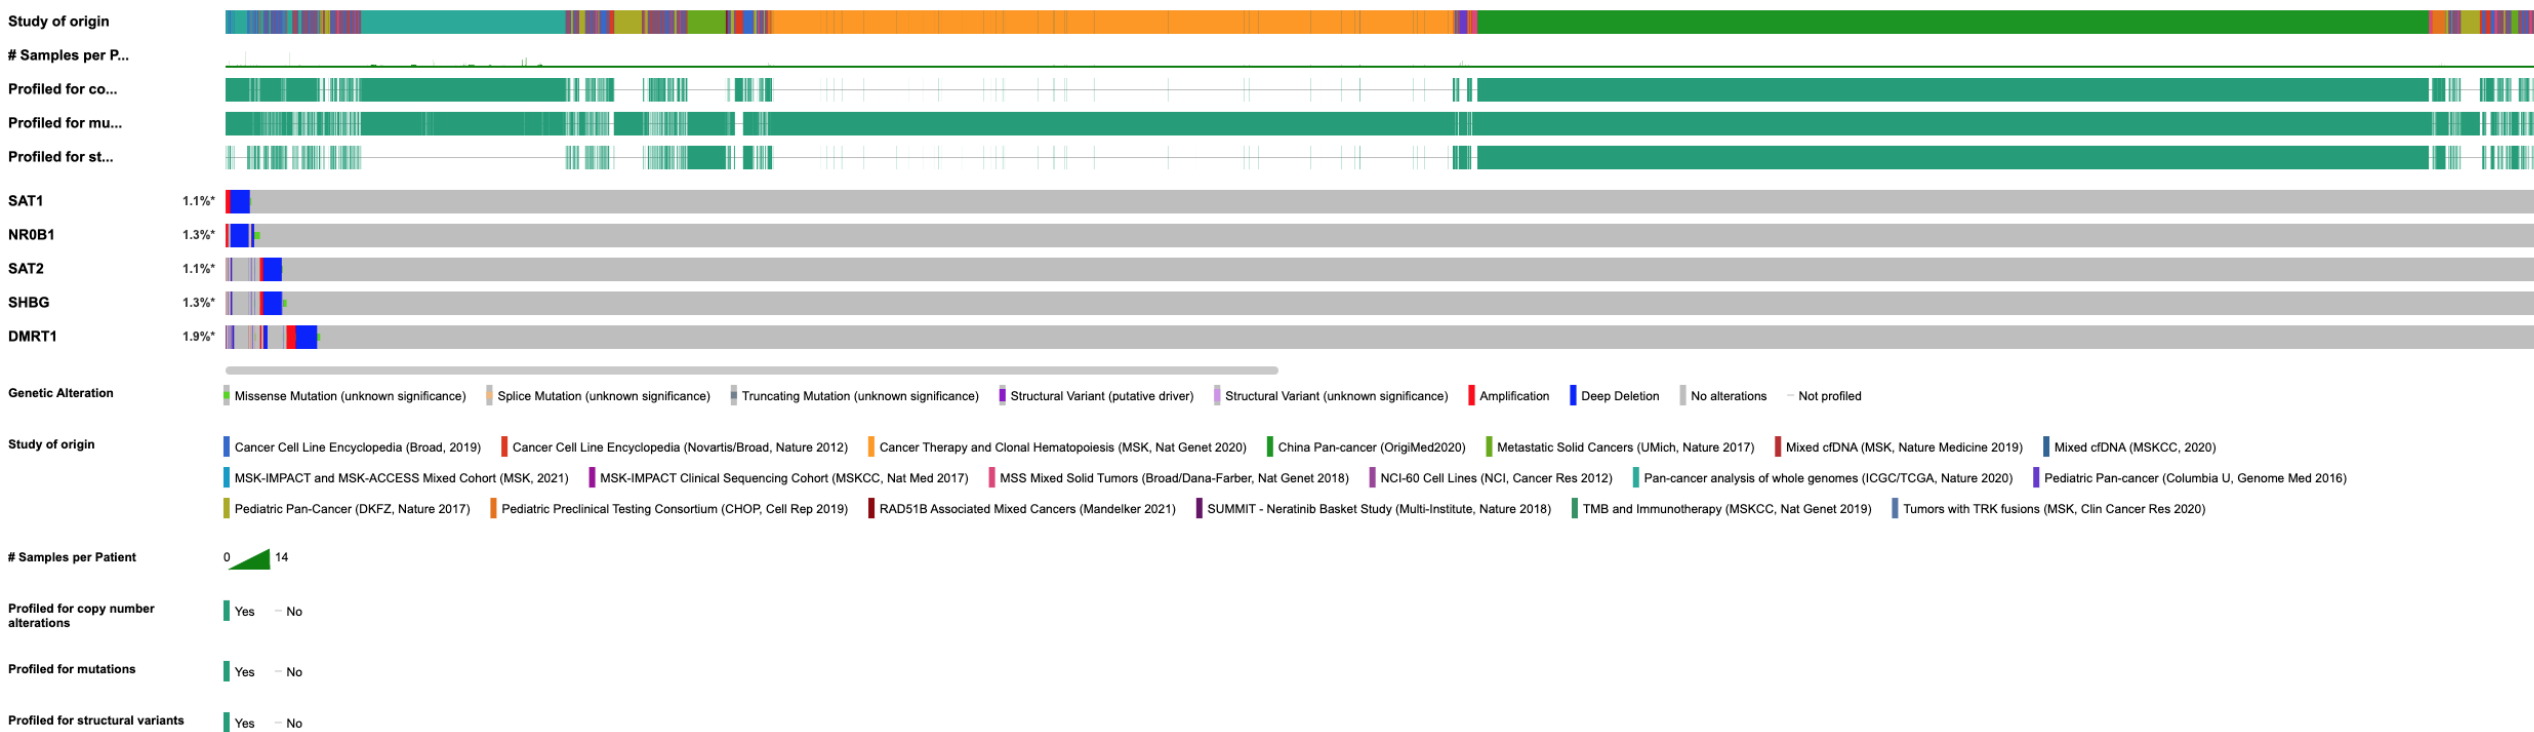



# OVARIAN CANCER

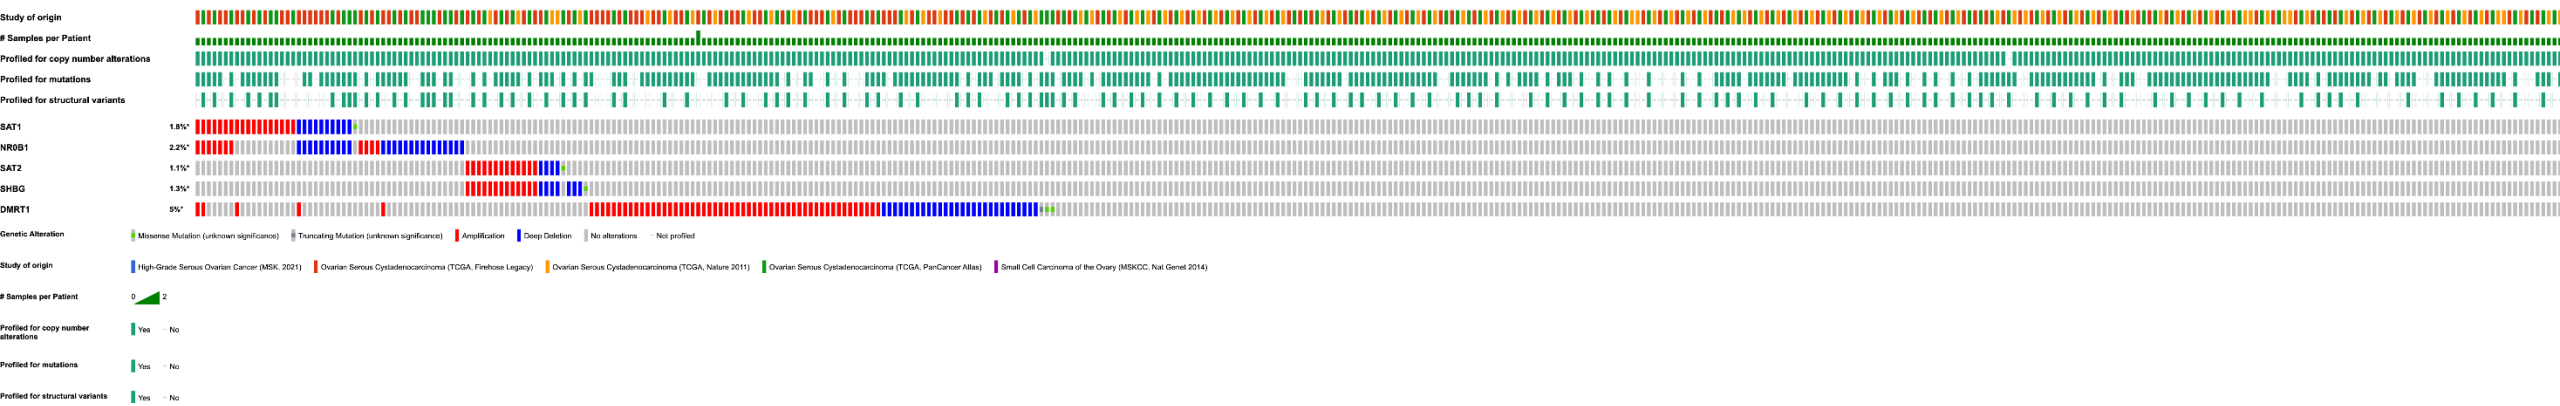

# PAN-CANCER STUDIES

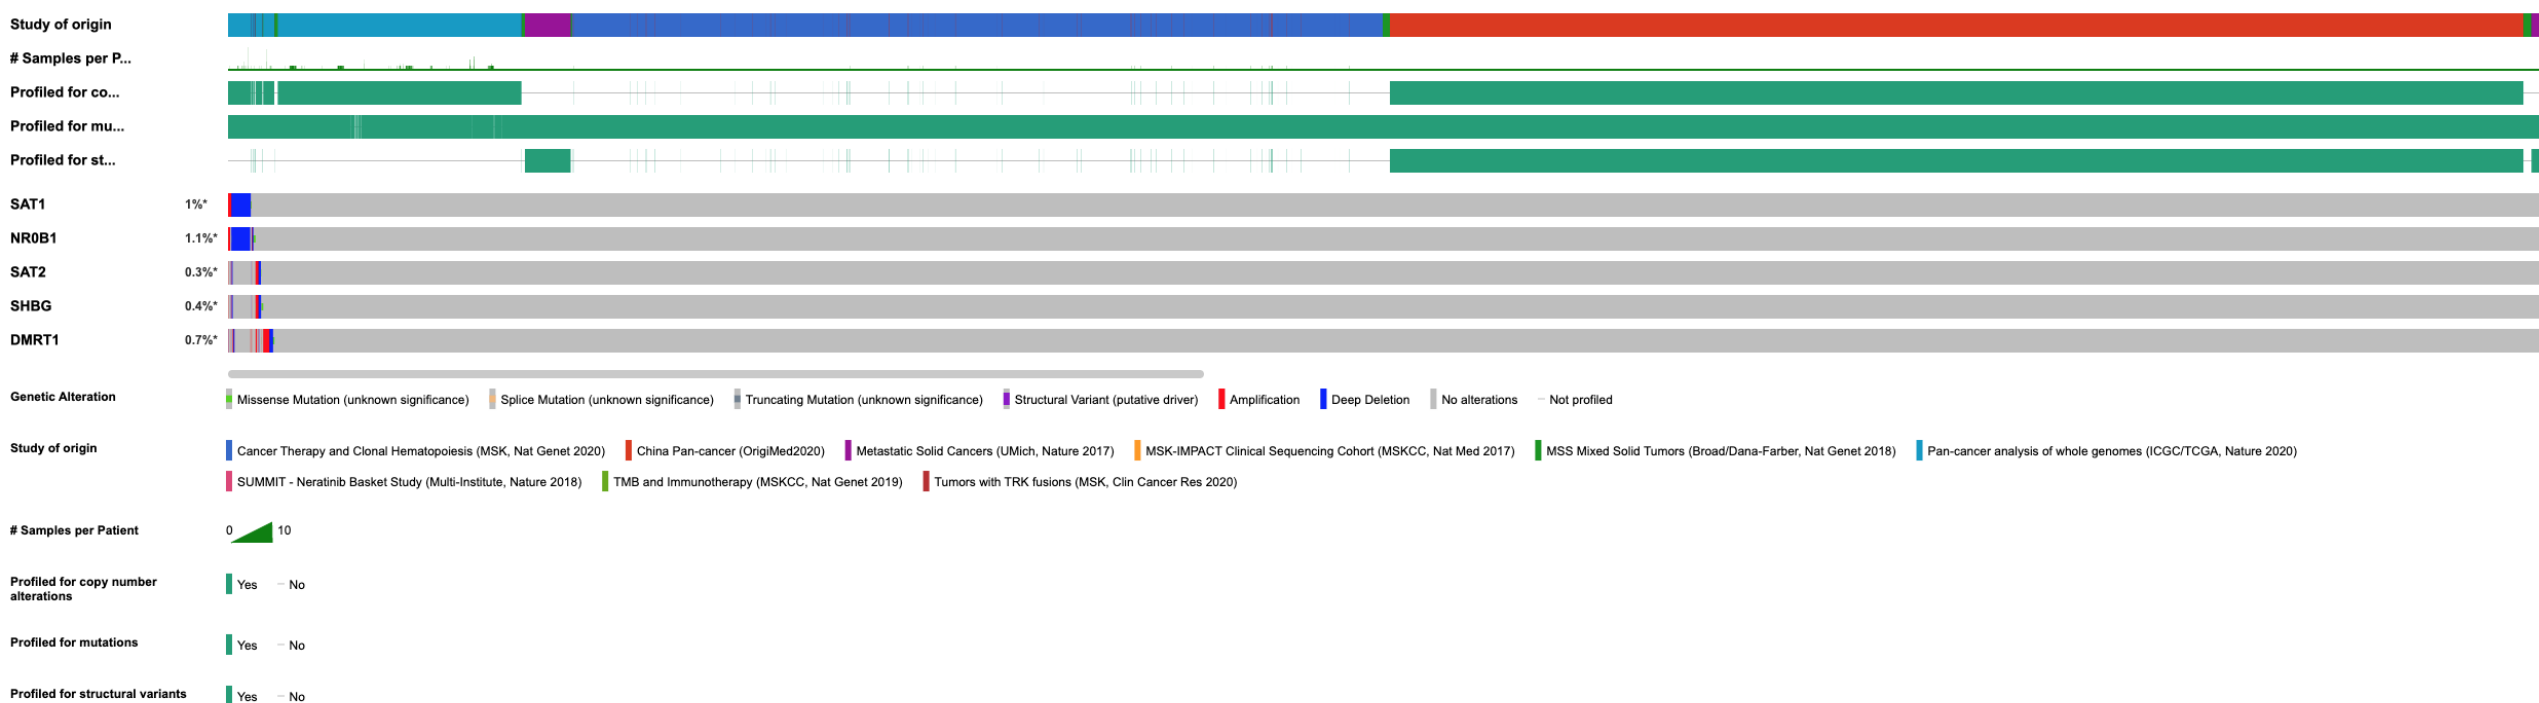

# PANCREAS

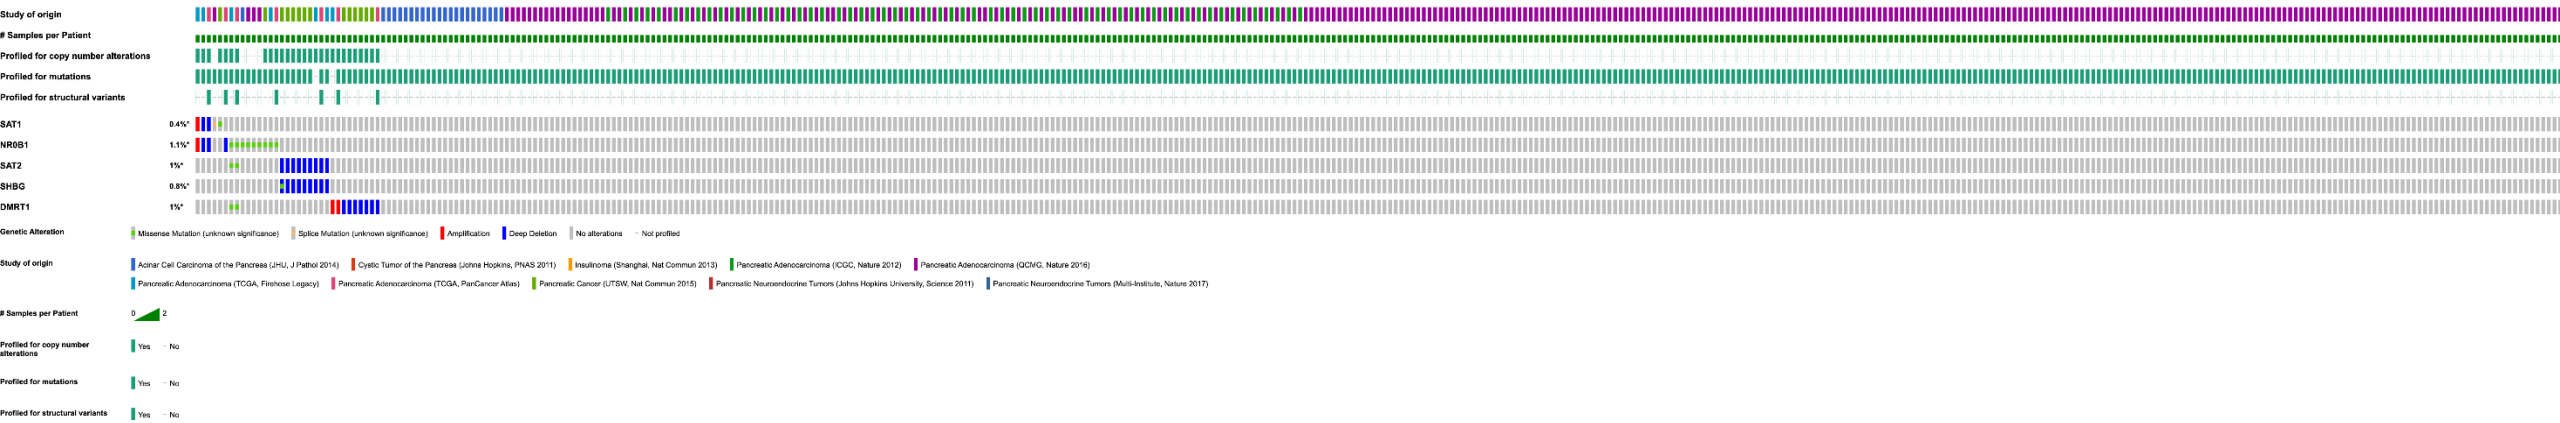

# PEDIATRIC CANCERS

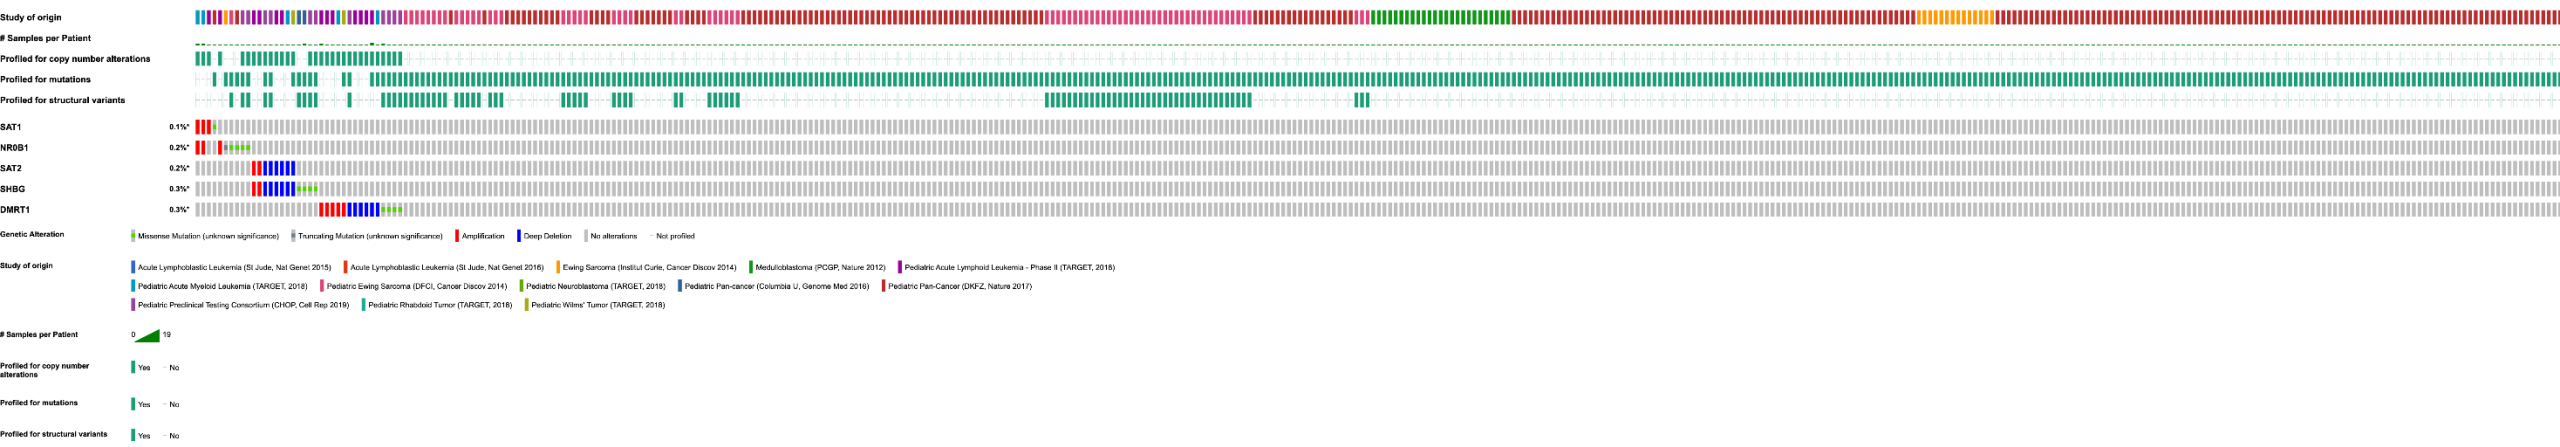

# PERIFERAL NERVOUS SYSTEM CANCERS

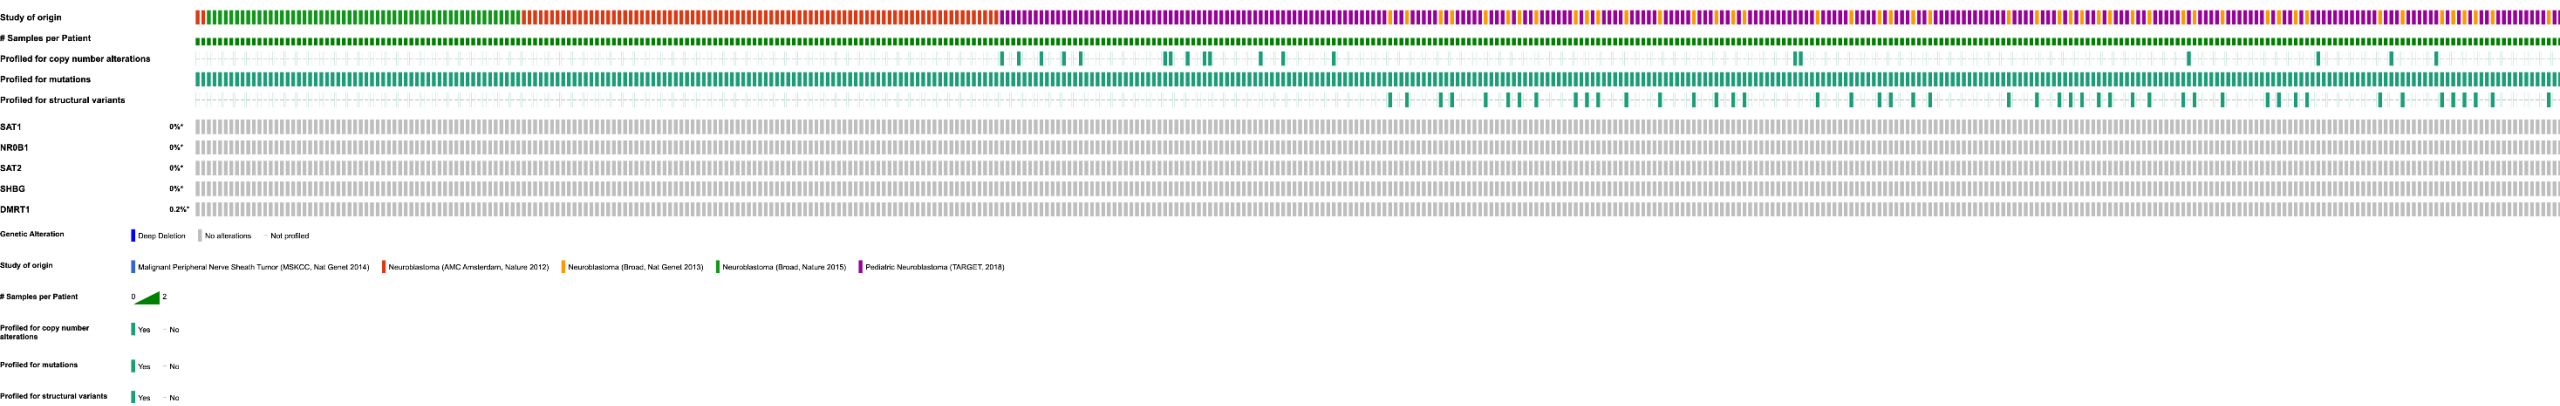

# PLEURA

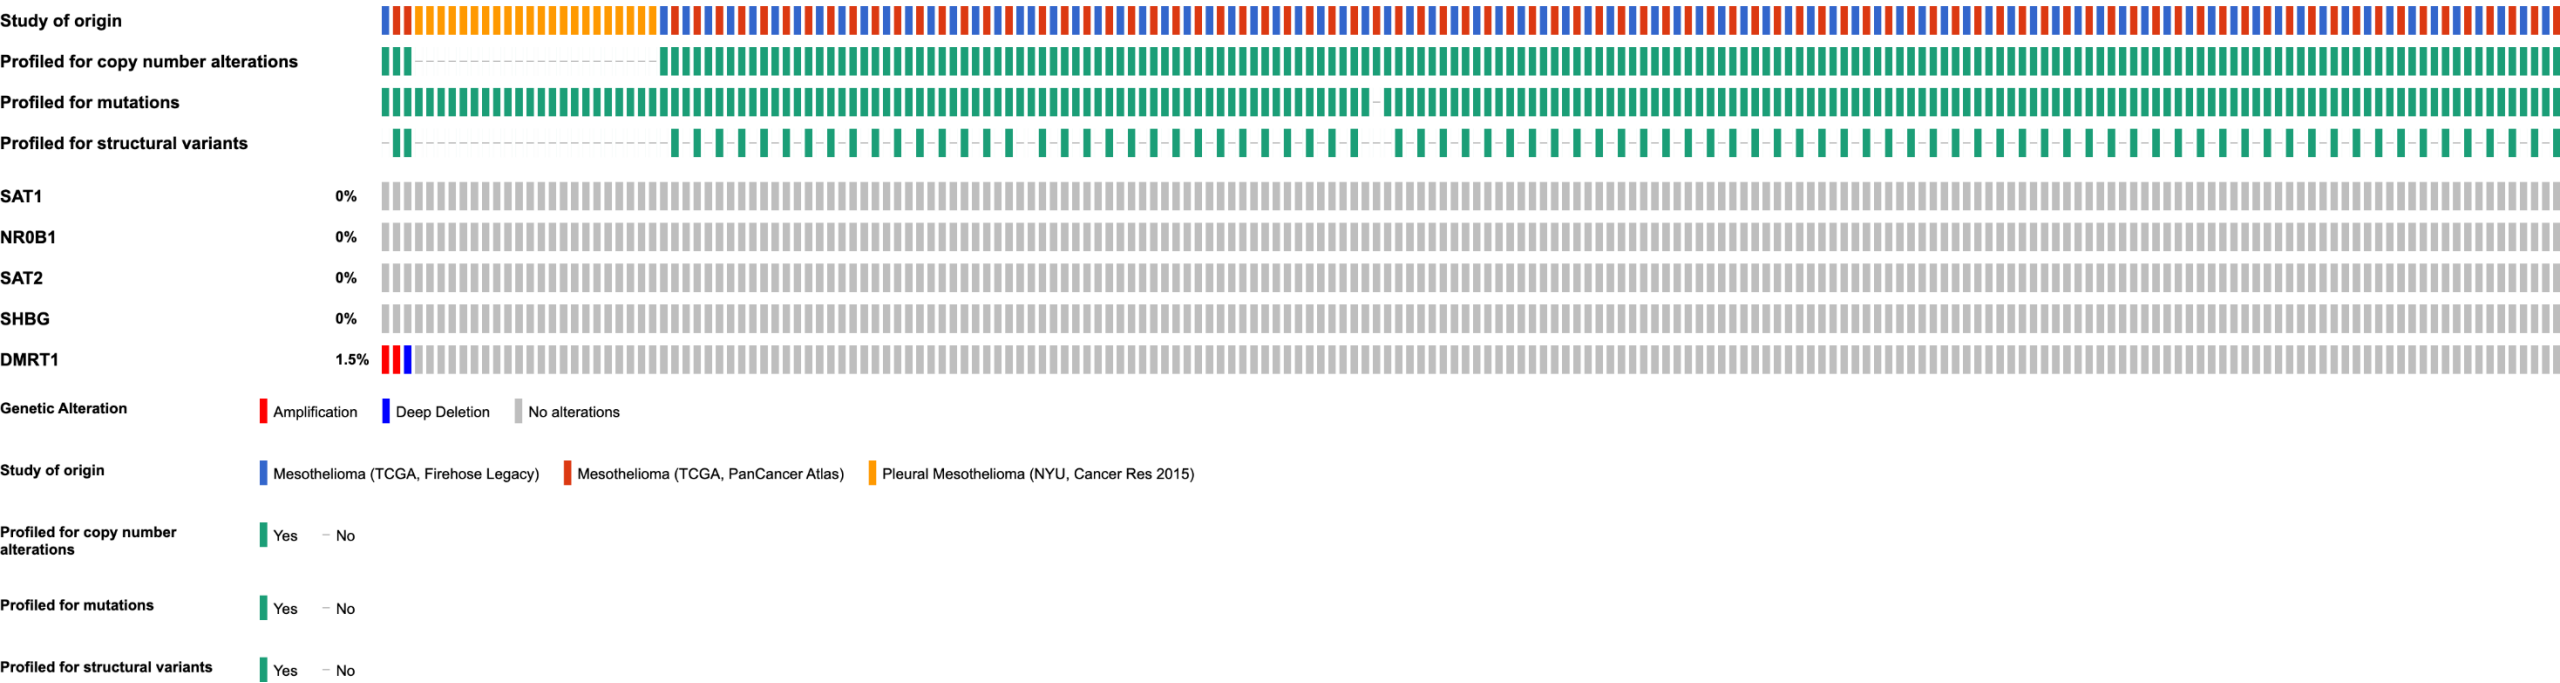

# PROSTRATE CANCER

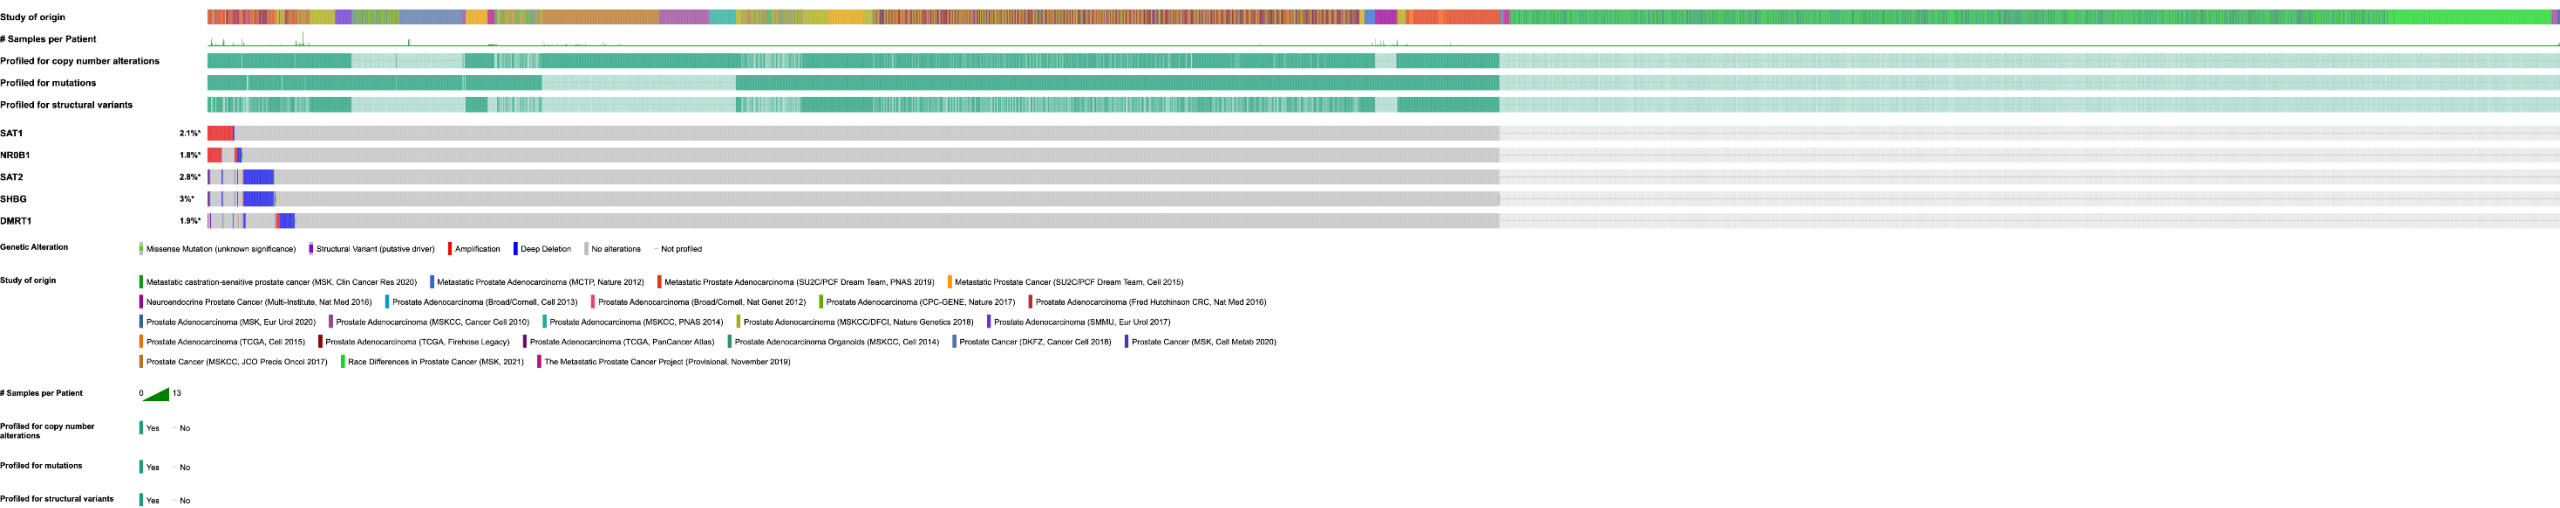

# AML / BLOOD CANCERS

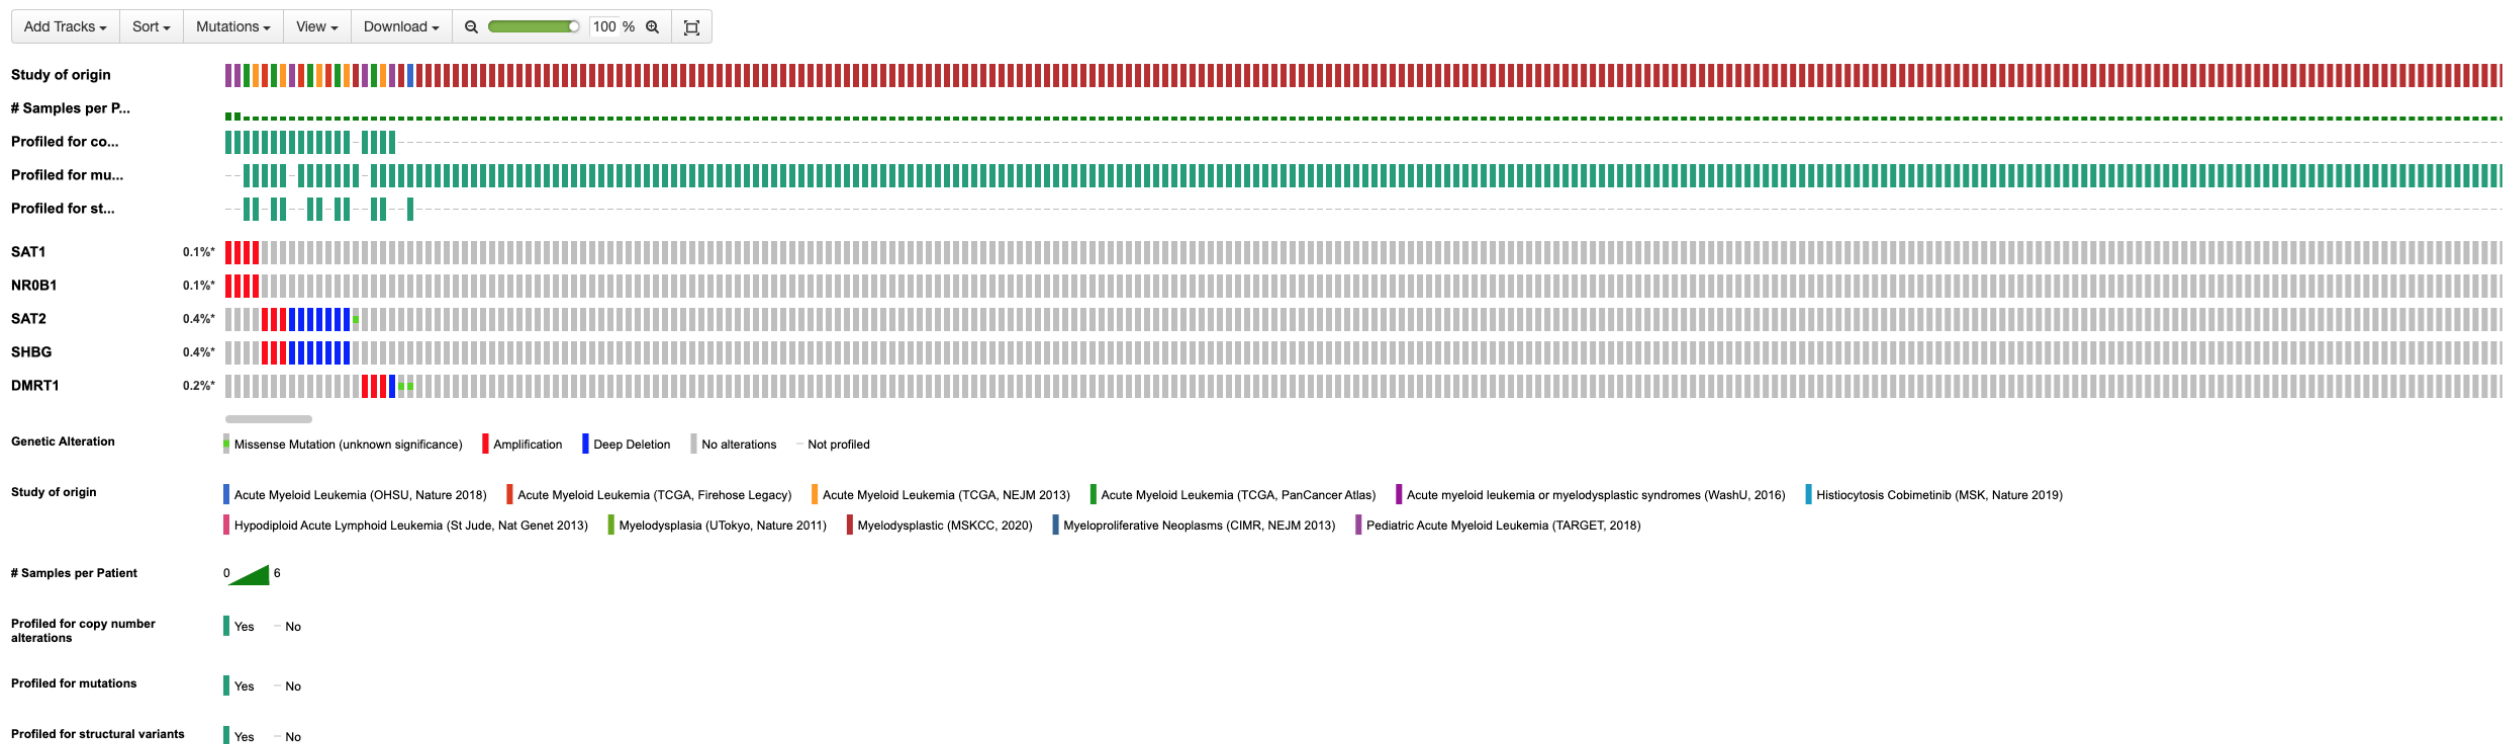



# SKIN CANCERS

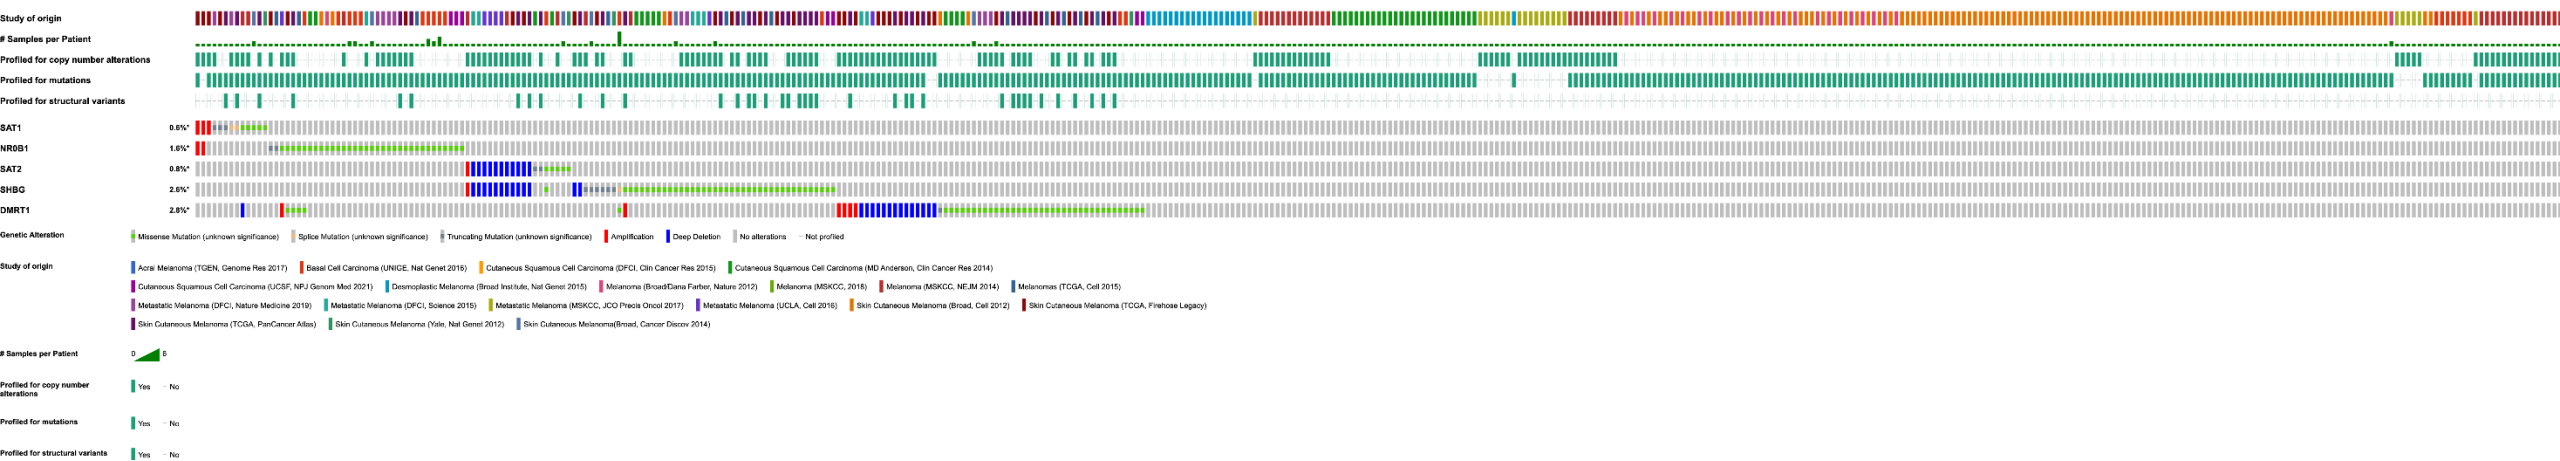

# SOFT TISSUES

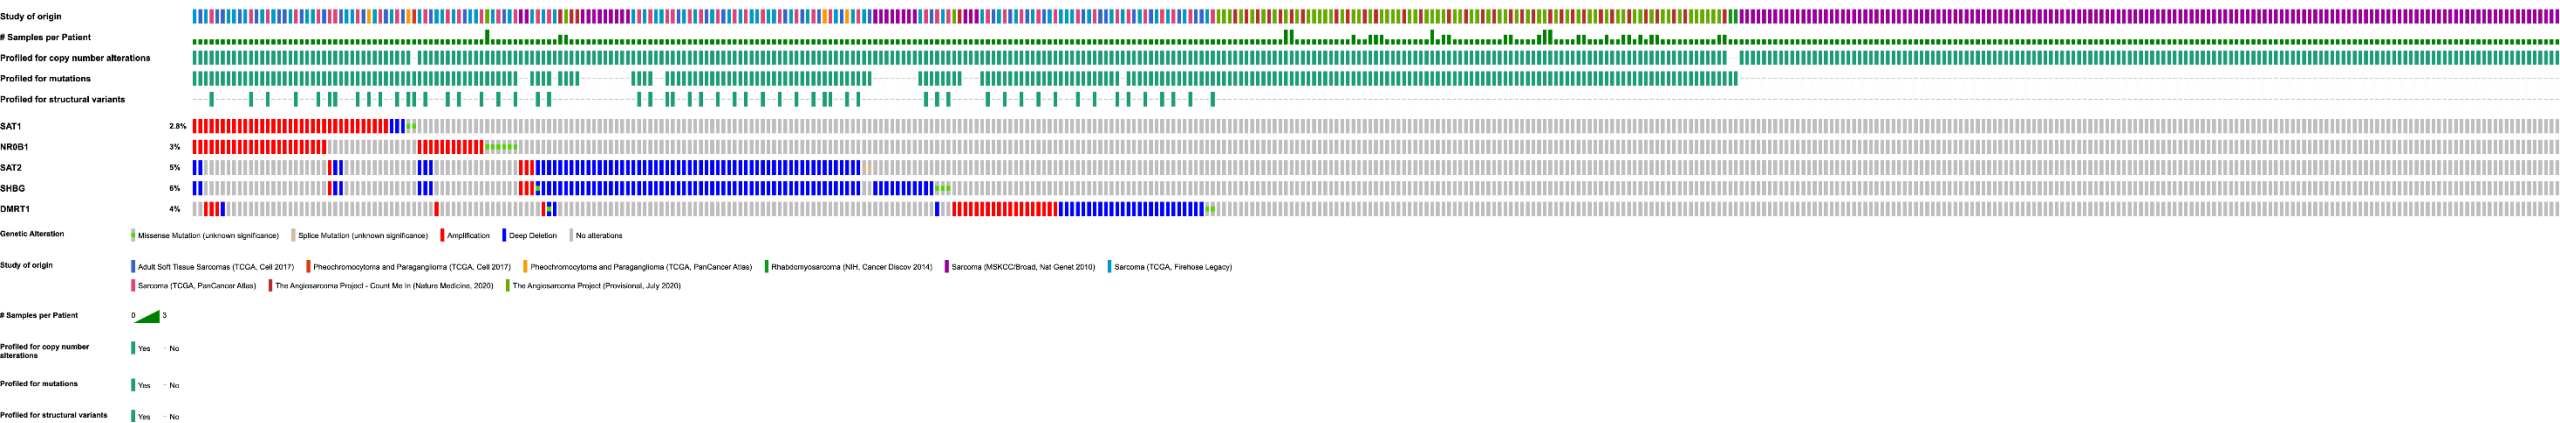

# TESTIS CANCERS

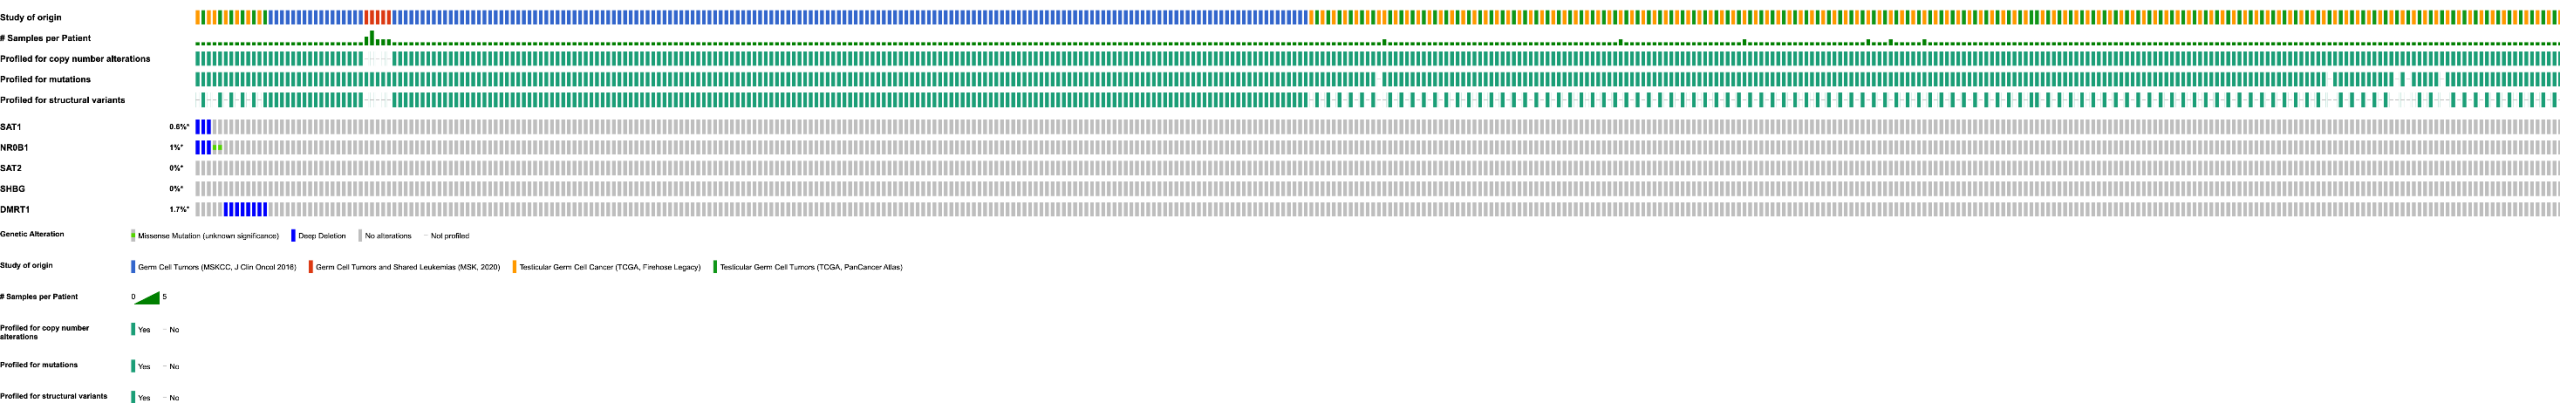

# THYMUS CANCER

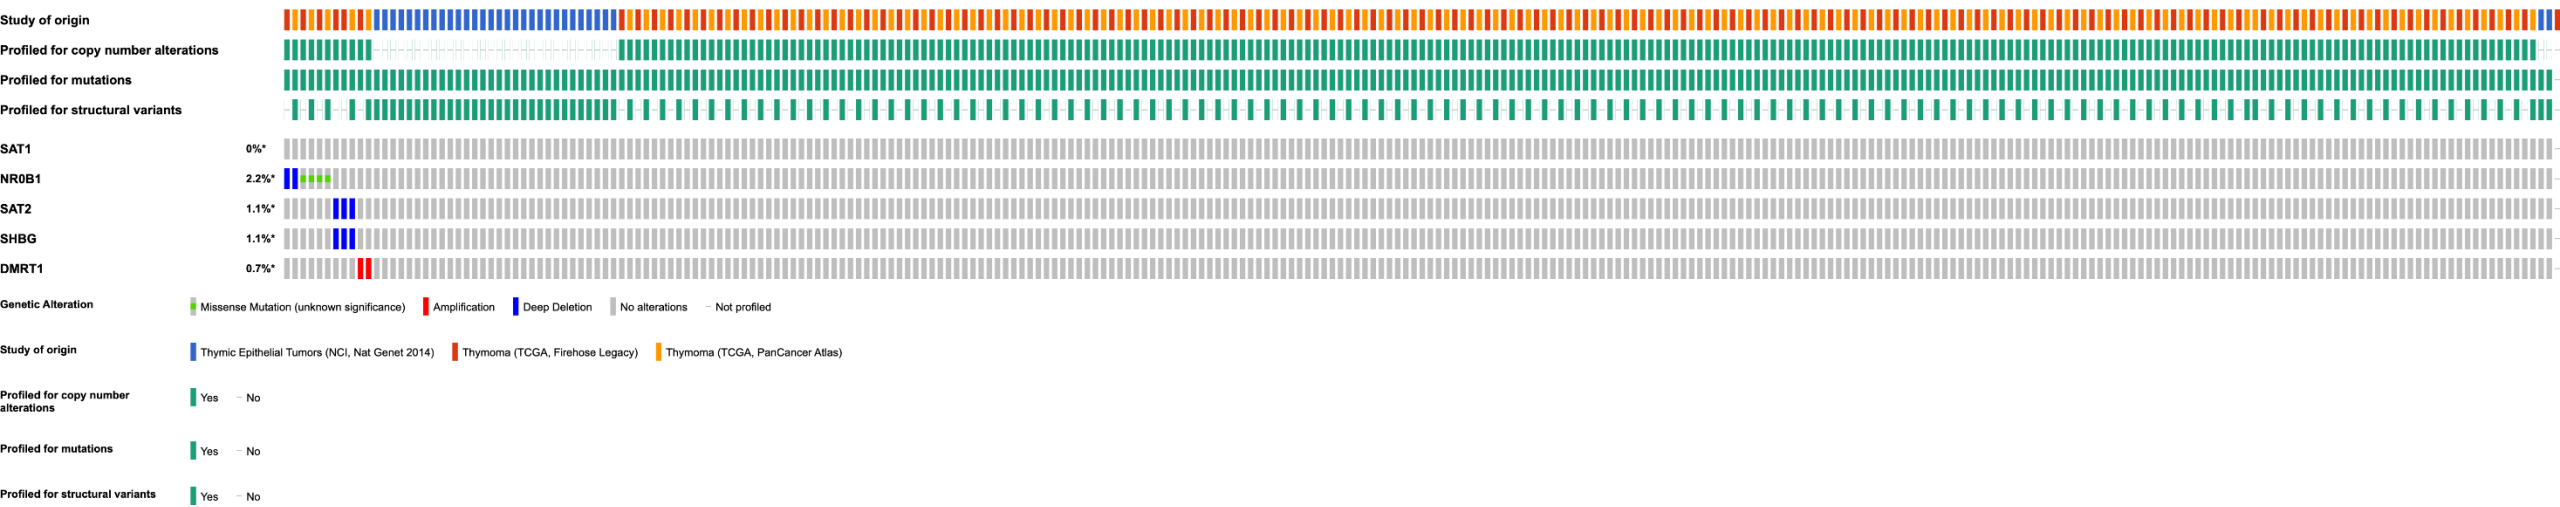

# THYROID CANCER

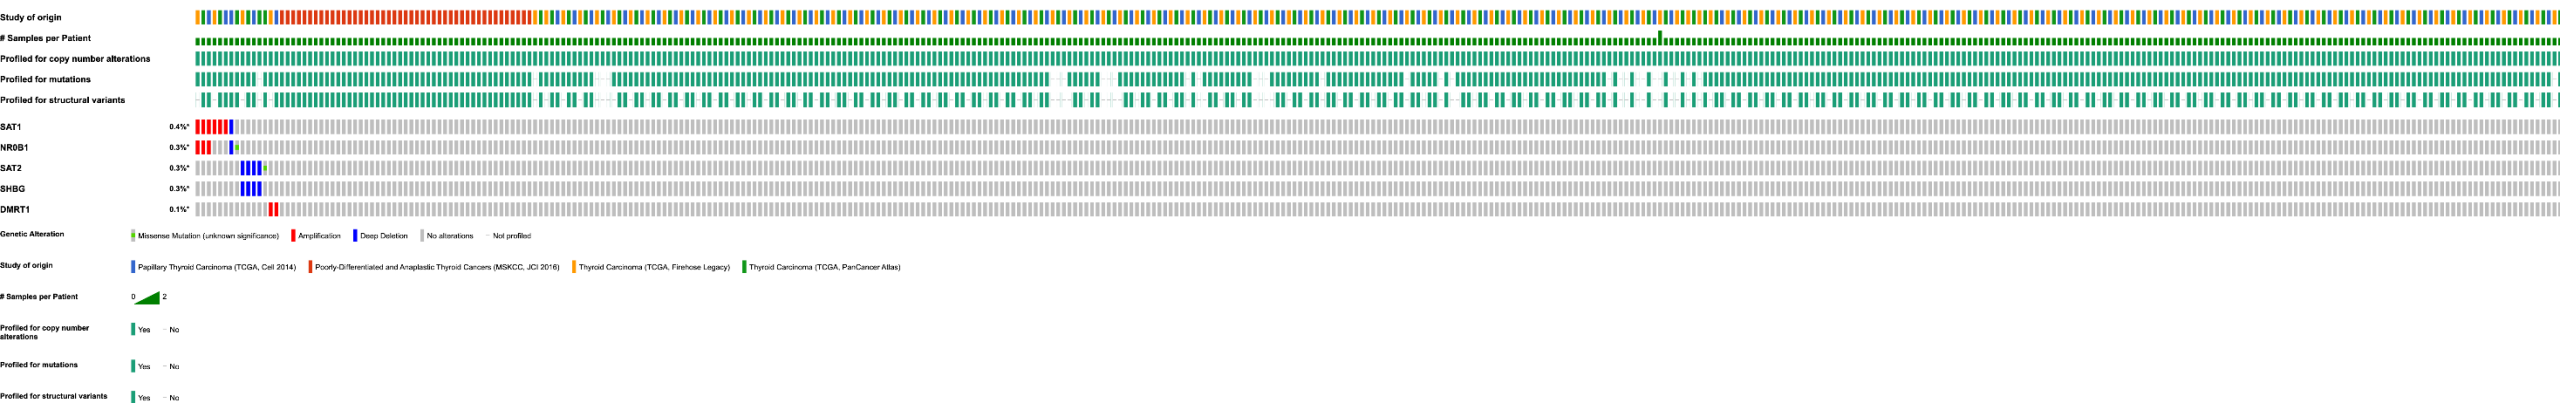

# URETHRA

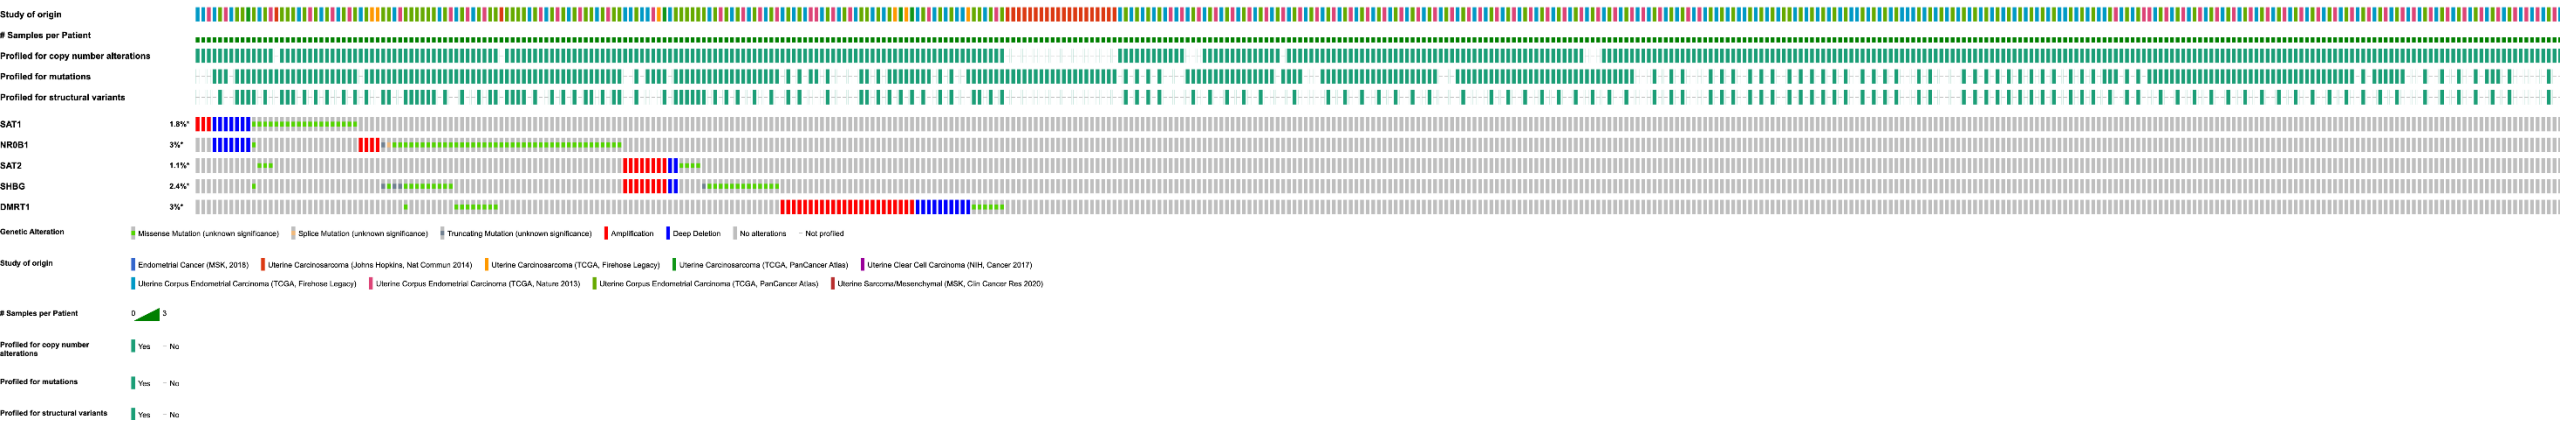

Supplement: Supplementary file 1 [file 4bbc4ae0460ab9544acb75af.pdf]
